# Supplementary material
Source: MDPI journal article supplement (https://www.mdpi.com/2071-1050/13/11/5802)
Supplement: s1 [file s1]

Supplementary Figures

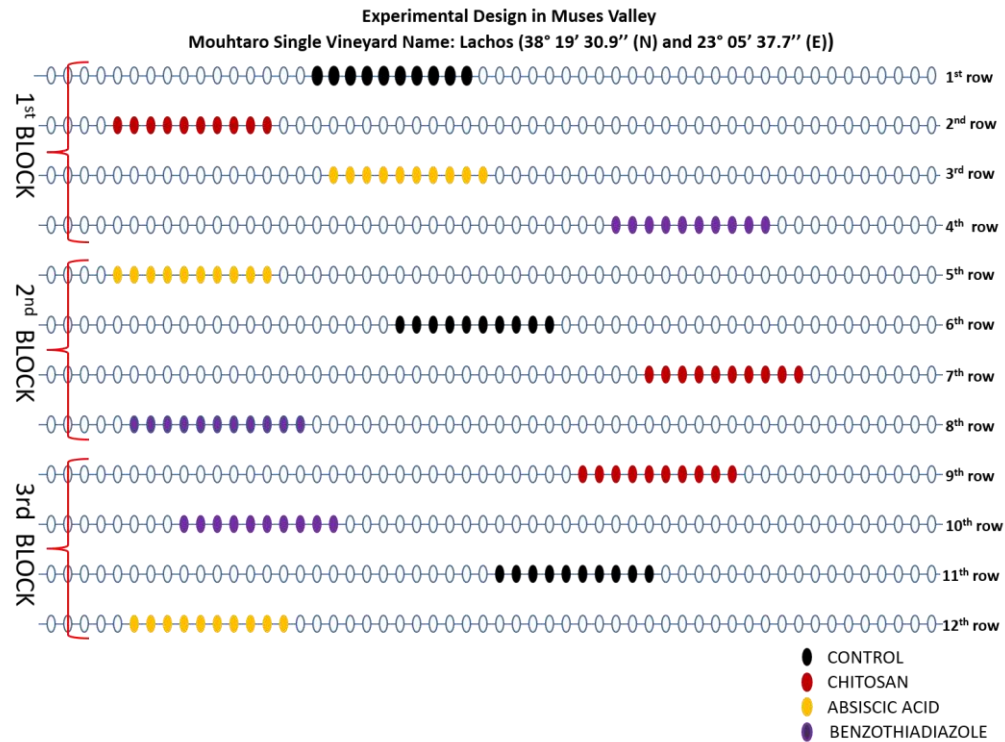

(a)

**Sampling at Optimum Technological Maturity stage (Harvest)**

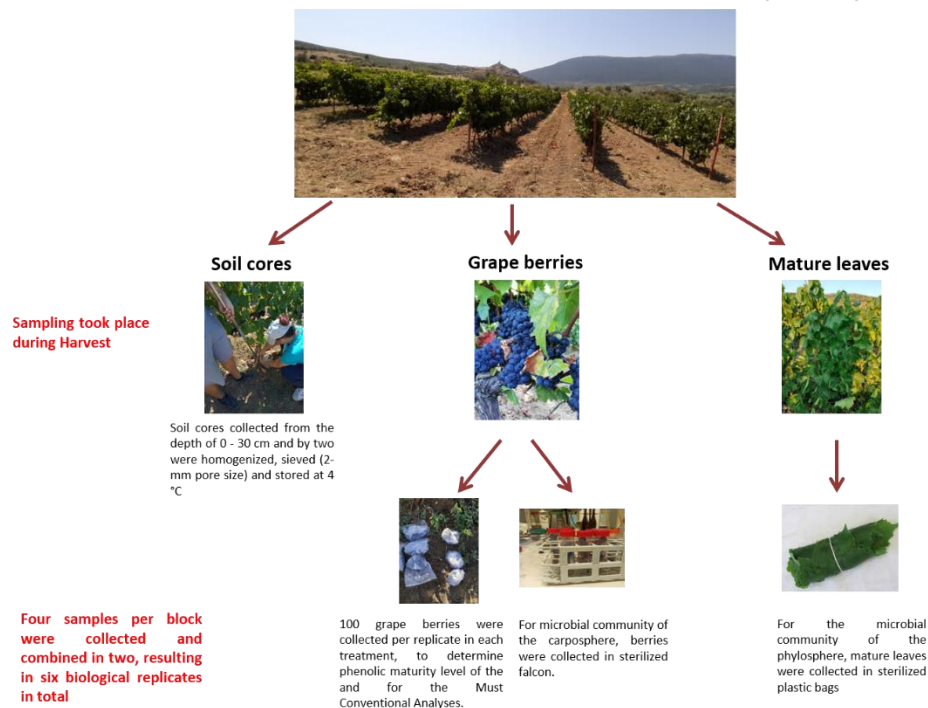

(b)

**Supplementary Figure S1.** (a) Graphical representation of the experimental set up. Circles represent vines and different colors correspond to the applied treatments. (b) Flowchart of the sampling procedure.

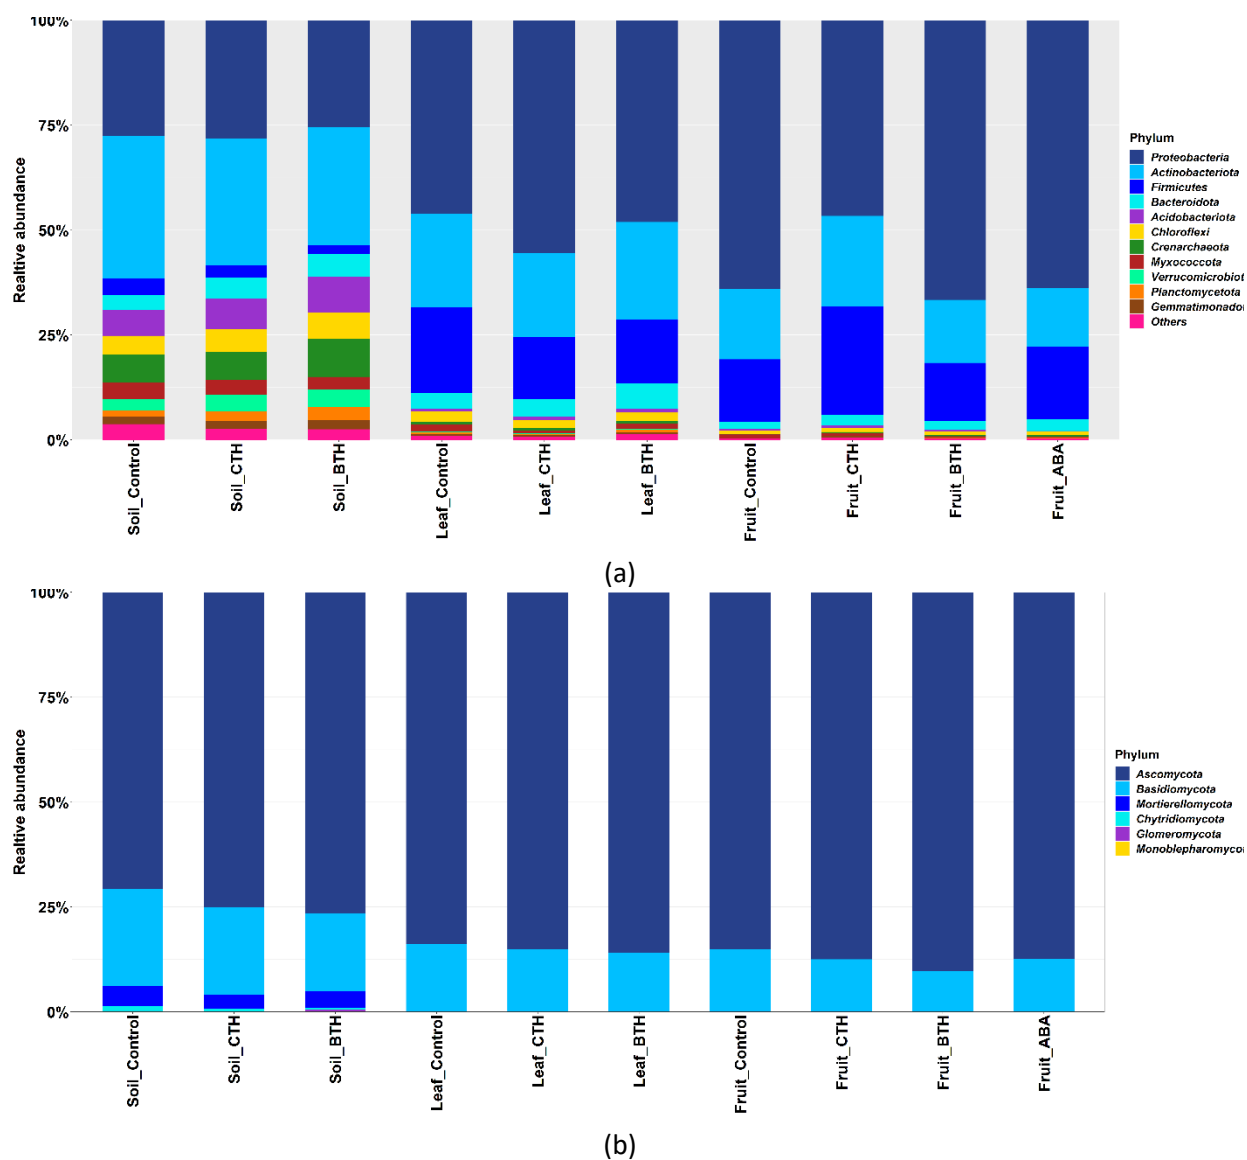

**Supplementary Figure S2.** (a) Prokaryotic and (b) fungal community composition at the phylum level (ten most abundant phyla shown) across habitats (rhizosphere: Soil; phyllosphere: Leaf and carposphere: Fruit) and treatments (Control, CHT, BTH, ABA). Significant differences between treatments for each habitat are shown in Supplementary Table 1.

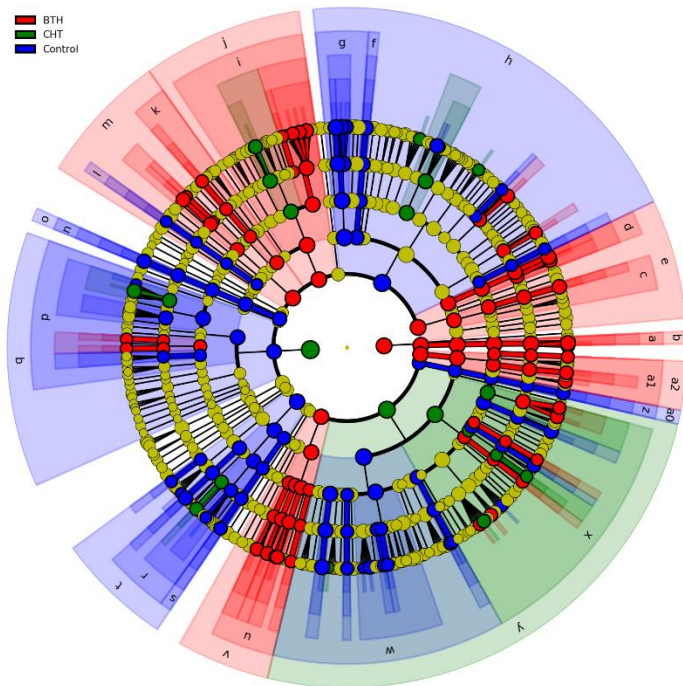

(a)

- a: Nitrososphaeria
- b: Crenarchaeota
- c: Blastocatellia
- d: Vicinamibacteria
- e: Acidobacteriota
- f: Rubrobacteria
- g: Thermoleophila
- h: Actinobacteriota
- i: Bacteroidia
- j: Bacteroidota
- k: Anaerolineae
- l: P2\_11E
- m: Chloroflexi
- n: Entothionellia
- o: Entothionellaeota
- p: Bacilli
- q: Firmicutes
- r: Polyangia
- s: bacteriap25
- t: Myxococcota
- u: Planctomycetes
- v: Planctomycetota
- w: Alphaproteobacteria
- x: Gammaproteobacteria
- y: Proteobacteria
- z: RCP2\_54\_Unknown
- a0: RCP2\_54
- a1: Verrucomicrobiae
- a2: Verrucomicrobiota

- BTH
- CHT
- Control

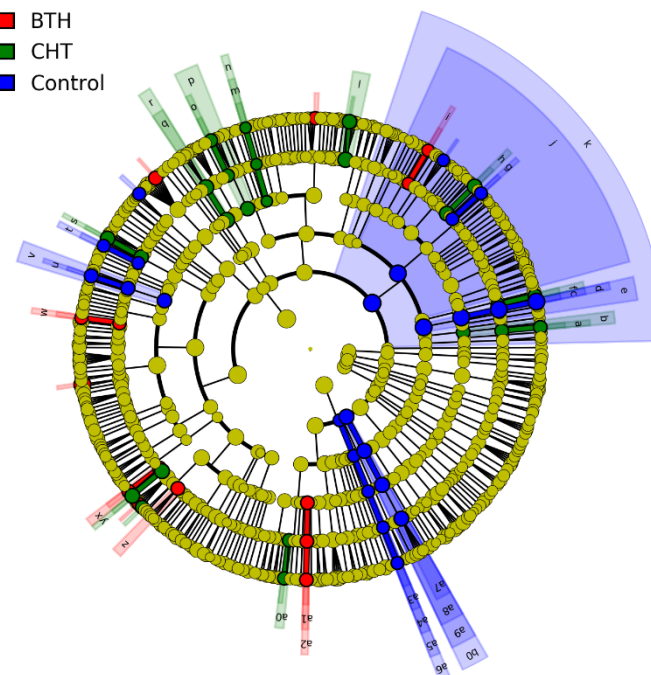

(b)

- a: Cladosporium\_Unknown
- b: Cladosporiaceae
- c: Hormonemavitticola
- d: Dothioraceae
- e: Dothideales
- f: Arthrographischlamyospora
- g: Setophaeosphaeriabaddalingensis
- h: Alternariaalternata
- i: Preussiaterricola
- j: Pleosporales
- k: Dothideomycetes
- l: Aspergillus\_Unknown
- m: Emmonsiiellopsicoralliformis
- n: Ajellomycetaceae
- o: Chrysosporiumspseudomeridarium
- p: Onygenales\_fam\_Incertae\_sedis
- q: Helotiales\_Unknown
- r: Helotiales\_Unknown
- s: Plectosphaerella\_Unknown
- t: Plectosphaerellaniemeljarum
- u: Trichoderma\_Unknown
- v: Hypocreaeaceae
- w: Dactylonectriamacrodidyma
- x: Amesiaatrobrunnea
- y: Botryotrichumspirotrichum
- z: Chaetomiumangustispirale
- a0: Leucocoprinusstraminellus
- a1: Coprinellusverrucispermus
- a2: Psathyrellaceae
- a3: Basidioascuspersicus
- a4: Geminibasidiaceae
- a5: Geminibasidiaceae
- a6: Geminibasidiomycetes
- a7: Rhodotorula\_Unknown
- a8: Sporidiobolaceae
- a9: Sporidiobolales
- b0: Microbotryomycetes

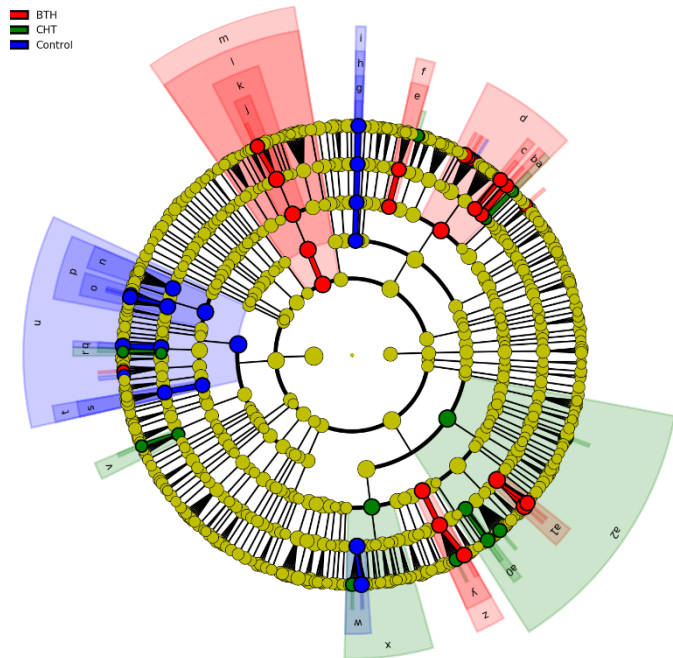

(c)

- a: Brevibacteriaceae
- b: Cellulomonadaceae
- c: Intrasporangiaceae
- d: Micrococcales
- e: Pseudonocardaceae
- f: Pseudonocardiales
- g: Rubrobacteriaceae
- h: Rubrobacterales
- i: Rubrobacteria
- j: Hymenobacteraceae
- k: Cytophagales
- l: Bacteroidia
- m: Bacteroidia
- n: Bacillaceae
- o: Planococcaceae
- p: Bacillales
- q: Lactobacillaceae
- r: Leuconostocaceae
- s: Thermoactinomycetaceae
- t: Thermoactinomycetales
- u: Bacilli
- v: Peptostreptococcales\_Tissierellales\_fa
- w: Beijerinckiaceae
- x: Rhizobiales
- y: Sphingomonadaceae
- z: Sphingomonadales
- aa: Burkholderiaceae
- a1: Oxalobacteraceae
- a2: Gammaproteobacteria

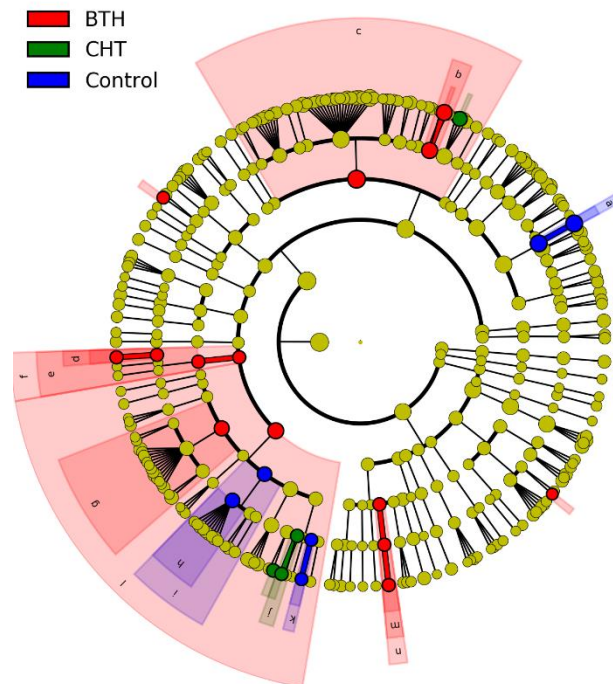

(d)

- a: Mycosphaerellaceae
- b: Didymosphaeriaceae
- c: Pleosporales
- d: Debaryomycetaceae
- e: Saccharomycetales
- f: Saccharomycetes
- g: Hypocreales
- h: Chaetomiaceae
- i: Sordariales
- j: Apiosporaceae
- k: Xylariaceae
- l: Sordariomycetes
- m: Ganodermataceae
- n: Polyporales



ABA  
BTH  
CTH  
Control

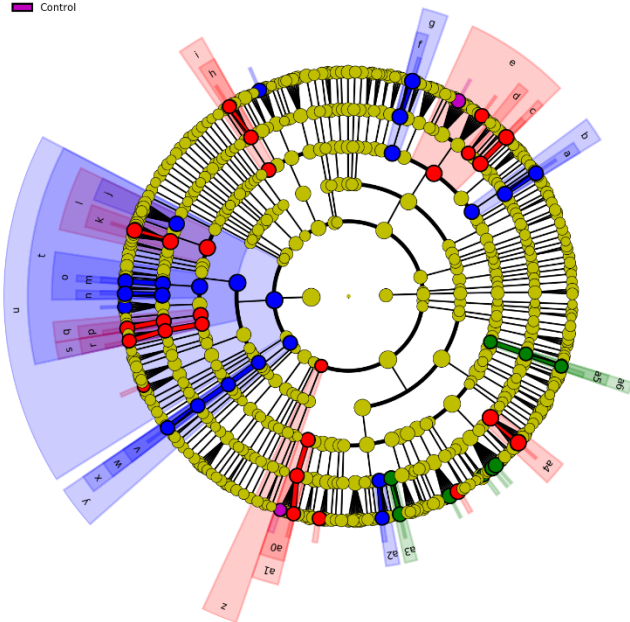

(e)

a: Corynebacteriaceae  
b: Corynebacteriales  
c: Brevibacteriaceae  
d: Intraspangliaceae  
e: Micrococcales  
f: Propionibacteriaceae  
g: Propionibacteriales  
h: Sphingobacteriaceae  
i: Sphingobacteriales  
j: Bacillaceae  
k: Planococcaceae  
l: Bacillales  
m: Lactobacillaceae  
n: Streptococcaceae  
o: Lactobacillales  
p: Staphylococcaceae  
q: Staphylococcales  
r: Thermoactinomycetaceae  
s: Thermoactinomycetales  
t: Bacilli  
u: Firmicutes  
v: Gemmatimonadaceae  
w: Gemmatimonadales  
x: Gemmatimonadetes  
y: Gemmatimonadota  
z: Planctomycetota  
a0: Acetobacteraceae  
a1: Acetobacterales  
a2: Rhizobiaceae  
a3: Xanthobacteraceae  
a4: Oxalobacteraceae  
a5: Solimonadaceae  
a6: Salinisphaerales

ABA  
BTH  
CTH  
Control

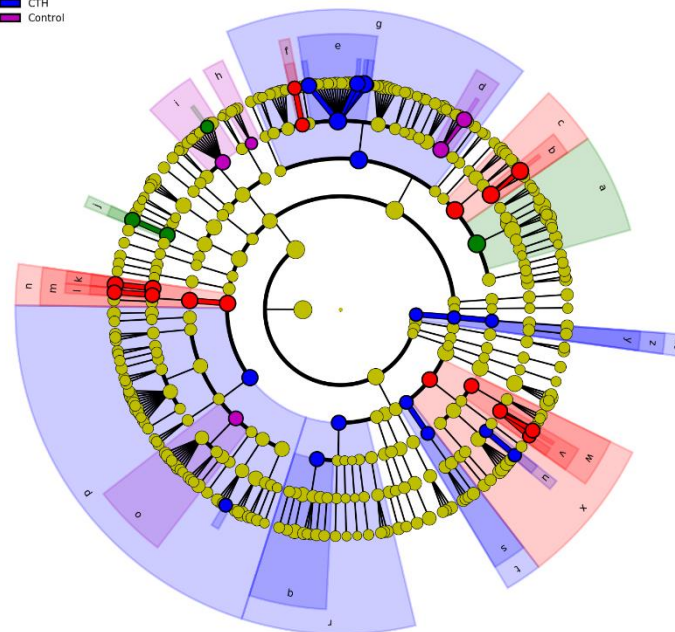

(f)

a: Capnoidiales  
b: Aureobasidiaceae  
c: Dothideales  
d: Didymellaceae  
e: Pleosporaceae  
f: Pleosporales\_fam\_Incertae\_sedis  
g: Pleosporales  
h: Herpotrichiellaceae  
i: Aspergillaceae  
j: Sclerotiniaceae  
k: Debaryomycetaceae  
l: Saccharomycetaceae  
m: Saccharomycetales  
n: Saccharomycetes  
o: Sordariales  
p: Sordariomycetes  
q: Agaricales  
r: Agaricomycetes  
s: Pucciniales  
t: Pucciniomycetes  
u: Piskurozymaceae  
v: Bulleribasidiaceae  
w: Tremellales  
x: Tremellomycetes  
y: Mucorales  
z: Mucoromycetes  
a0: Mucoromycota

**Supplementary Figure S3.** Cladograms based on linear discriminant analysis (LDA) effect size (LEfSe) analysis of the (a, c, e) prokaryotic and (b, d, f) fungal communities among all sampling sites rhizosphere (a, b), phyllosphere (c, d) and carposphere (e, f).

# Supplementary Tables

**Supplementary Table S1.** The prokaryotic community composition at the phylum level (ten most abundant phyla shown) across habitats and treatments (Control, CHT, BTH, ABA). Letters Significant differences between treatments within each habitat and for each phylum are indicated with different letters at  $p < 0.05$  (Tukey's post hoc test).

|                     | <i>Proteobacteria</i> | <i>Actinobacteriota</i> | <i>Firmicutes</i> | <i>Bacteroidota</i> | <i>Acidobacteriota</i> | <i>Chloroflexi</i> | <i>Chrenarchaeota</i> | <i>Myxococcota</i> | <i>Verrucomicrobiota</i> | <i>Planctomycetota</i> | <i>Gemmatimonadota</i> | Other |
|---------------------|-----------------------|-------------------------|-------------------|---------------------|------------------------|--------------------|-----------------------|--------------------|--------------------------|------------------------|------------------------|-------|
| <b>Rhizosphere</b>  |                       |                         |                   |                     |                        |                    |                       |                    |                          |                        |                        |       |
| <b>Control</b>      | 27.11% <b>a</b>       | 33.03% <b>a</b>         | 3.05% <b>a</b>    | 4.21% <b>a</b>      | 6.63% <b>a</b>         | 4.55% <b>a</b>     | 6.13% <b>a</b>        | 5.07% <b>a</b>     | 2.87% <b>a</b>           | 1.80% <b>a</b>         | 1.68% <b>a</b>         | 3.86% |
| <b>CTH</b>          | 27.35% <b>a</b>       | 31.40% <b>a</b>         | 2.92% <b>a</b>    | 6.04% <b>b</b>      | 6.27% <b>a</b>         | 5.18% <b>a</b>     | 5.45% <b>a</b>        | 3.88% <b>b</b>     | 3.95% <b>a</b>           | 2.76% <b>a</b>         | 2.14% <b>a</b>         | 2.67% |
| <b>BTH</b>          | 24.89% <b>a</b>       | 25.55% <b>b</b>         | 1.72% <b>a</b>    | 6.92% <b>b</b>      | 8.38% <b>b</b>         | 6.33% <b>b</b>     | 8.74% <b>b</b>        | 2.91% <b>b</b>     | 4.94% <b>b</b>           | 4.60% <b>b</b>         | 2.39% <b>a</b>         | 2.63% |
| <b>Phylosphere</b>  |                       |                         |                   |                     |                        |                    |                       |                    |                          |                        |                        |       |
| <b>Control</b>      | 44.20% <b>a</b>       | 22.76% <b>a</b>         | 19.06% <b>a</b>   | 4.70% <b>a</b>      | 0.94% <b>a</b>         | 2.58% <b>a</b>     | 0.68% <b>a</b>        | 2.03% <b>a</b>     | 0.14% <b>a</b>           | 1.01% <b>a</b>         | 0.41% <b>a</b>         | 1.48% |
| <b>CTH</b>          | 49.92% <b>a</b>       | 23.03% <b>a</b>         | 13.85% <b>b</b>   | 5.84% <b>a</b>      | 1.09% <b>a</b>         | 2.22% <b>a</b>     | 0.82% <b>a</b>        | 1.05% <b>a</b>     | 0.10% <b>a</b>           | 0.51% <b>a</b>         | 0.43% <b>a</b>         | 1.14% |
| <b>BTH</b>          | 46.78% <b>a</b>       | 25.12% <b>a</b>         | 11.79% <b>b</b>   | 7.72% <b>b</b>      | 1.24% <b>a</b>         | 2.18% <b>a</b>     | 0.78% <b>a</b>        | 1.50% <b>a</b>     | 0.19% <b>a</b>           | 0.75% <b>a</b>         | 0.51% <b>a</b>         | 1.44% |
| <b>Casrposphere</b> |                       |                         |                   |                     |                        |                    |                       |                    |                          |                        |                        |       |
| <b>Control</b>      | 62.18% <b>a</b>       | 18.25% <b>a</b>         | 14.18% <b>ab</b>  | 2.67% <b>a</b>      | 0.46% <b>a</b>         | 0.71% <b>a</b>     | 0.10% <b>a</b>        | 0.94% <b>a</b>     | 0.00%                    | 0.02% <b>a</b>         | 0.06% <b>b</b>         | 0.42% |
| <b>CTH</b>          | 44.50% <b>a</b>       | 22.92% <b>a</b>         | 23.39% <b>a</b>   | 4.18% <b>a</b>      | 0.70% <b>a</b>         | 0.97% <b>a</b>     | 0.15% <b>a</b>        | 0.70% <b>a</b>     | 0.00%                    | 0.00% <b>a</b>         | 1.36% <b>a</b>         | 1.12% |
| <b>BTH</b>          | 68.64% <b>a</b>       | 13.18% <b>a</b>         | 11.11% <b>b</b>   | 2.54% <b>a</b>      | 0.51% <b>a</b>         | 1.26% <b>a</b>     | 0.52% <b>a</b>        | 0.51% <b>a</b>     | 0.00%                    | 0.18% <b>a</b>         | 0.26% <b>b</b>         | 1.30% |
| <b>ABA</b>          | 54.64% <b>a</b>       | 17.03% <b>a</b>         | 20.24% <b>ab</b>  | 5.07% <b>a</b>      | 0.15% <b>a</b>         | 1.16% <b>a</b>     | 0.28% <b>a</b>        | 0.45% <b>a</b>     | 0.00%                    | 0.25% <b>a</b>         | 0.17% <b>b</b>         | 0.56% |

**Supplementary Table S2.** The fungal and community composition at the phylum level (ten most abundant phyla shown) across habitats and treatments (Control, CHT, BTH, ABA). Letters Significant differences between treatments within each habitat and for each phylum are indicated with different letters at  $p < 0.05$  (Tukey's post hoc test).

|                     | <i>Ascomycota</i> | <i>Basidiomycota</i> | <i>Mortierellomycota</i> | <i>Chytridiomycota</i> | <i>Mucoromycota</i> | <i>Glomeromycota</i> | <i>Monoblepharomycota</i> |
|---------------------|-------------------|----------------------|--------------------------|------------------------|---------------------|----------------------|---------------------------|
| <b>Rhizosphere</b>  |                   |                      |                          |                        |                     |                      |                           |
| <b>Control</b>      | 70.42% <b>a</b>   | 23.09% <b>a</b>      | 4.68% <b>a</b>           | 1.19% <b>a</b>         | 0.39% <b>a</b>      | 0.15% <b>a</b>       | 0.08% <b>a</b>            |
| <b>CTH</b>          | 74.65% <b>a</b>   | 20.65% <b>a</b>      | 3.36% <b>a</b>           | 0.59% <b>a</b>         | 0.55% <b>a</b>      | 0.12% <b>a</b>       | 0.06% <b>a</b>            |
| <b>BTH</b>          | 76.30% <b>a</b>   | 18.56% <b>a</b>      | 3.89% <b>a</b>           | 0.53% <b>a</b>         | 0.24% <b>a</b>      | 0.32% <b>a</b>       | 0.16% <b>a</b>            |
| <b>Phylosphere</b>  |                   |                      |                          |                        |                     |                      |                           |
| <b>Control</b>      | 83.59% <b>a</b>   | 16.09% <b>a</b>      | 0.01% <b>a</b>           | 0.02% <b>a</b>         | 0.29% <b>a</b>      | 0.00%                | 0.00%                     |
| <b>CTH</b>          | 85.00% <b>a</b>   | 14.88% <b>a</b>      | 0.01% <b>a</b>           | 0.00% <b>a</b>         | 0.11% <b>a</b>      | 0.00%                | 0.00%                     |
| <b>BTH</b>          | 85.81% <b>a</b>   | 14.03% <b>a</b>      | 0.01% <b>a</b>           | 0.03% <b>a</b>         | 0.11% <b>a</b>      | 0.00%                | 0.00%                     |
| <b>Casrposphere</b> |                   |                      |                          |                        |                     |                      |                           |
| <b>Control</b>      | 84.83% <b>a</b>   | 14.85% <b>a</b>      | 0.04% <b>a</b>           | 0.00%                  | 0.21% <b>a</b>      | 0.00%                | 0.00%                     |
| <b>CTH</b>          | 87.20% <b>a</b>   | 12.39% <b>a</b>      | 0.11% <b>a</b>           | 0.00%                  | 0.29% <b>a</b>      | 0.00%                | 0.00%                     |
| <b>BTH</b>          | 90.12% <b>a</b>   | 9.78% <b>a</b>       | 0.00% <b>b</b>           | 0.00%                  | 0.10% <b>a</b>      | 0.00%                | 0.00%                     |
| <b>ABA</b>          | 87.27% <b>a</b>   | 12.69% <b>a</b>      | 0.00% <b>b</b>           | 0.00%                  | 0.03% <b>a</b>      | 0.00%                | 0.00%                     |

**Supplementary Table S3.** The prokaryotic community members at the rhizosphere that emerged from LefSe analysis as discriminant for BTH and CHT treatments.

| Soil_16S |                  |                     |                    |                            |                            |        |           |          | Mean abundance |       | Relative |
|----------|------------------|---------------------|--------------------|----------------------------|----------------------------|--------|-----------|----------|----------------|-------|----------|
| BTH      |                  |                     |                    |                            |                            |        | LDA score | p value  | BTH            | CHT   | Control  |
| Archaea  | Crenarchaeota    | Nitrososphaeria     | Nitrososphaerales  | Nitrososphaeraceae         | Candidatus_Nitrososphaera  | ASV13  | 3.688497  | 0.03211  | 2.12%          | 1.17% | 1.37%    |
| Bacteria | Acidobacteriota  | Blastocatellia      | Pyrinomonadales    | Pyrinomonadaceae           | RB41                       | ASV44  | 3.613742  | 0.009683 | 1.26%          | 0.69% | 0.46%    |
| Bacteria | Actinobacteriota | Actinobacteria      | Frankiales         | Geodermatophilaceae        | Blastococcus               | ASV5   | 3.523651  | 0.028733 | 1.25%          | 0.89% | 0.59%    |
| Archaea  | Crenarchaeota    | Nitrososphaeria     | Nitrososphaerales  | Nitrososphaeraceae         | Nitrososphaeraceae_Unknown | ASV42  | 3.541284  | 0.007486 | 1.19%          | 0.53% | 0.60%    |
| Archaea  | Crenarchaeota    | Nitrososphaeria     | Nitrososphaerales  | Nitrososphaeraceae         | Candidatus_Nitrocosmicus   | ASV41  | 3.43638   | 0.003399 | 1.13%          | 0.62% | 0.61%    |
| Bacteria | Chloroflexi      | Chloroflexia        | Thermomicrobiales  | JG30_KF_CM45               | JG30_KF_CM45_Unknown       | ASV26  | 3.548619  | 0.017997 | 1.06%          | 0.58% | 0.37%    |
| Bacteria | Chloroflexi      | KD4_96              | KD4_96_Unknown     | KD4_97_Unknown             | KD4_98_Unknown             | ASV20  | 3.041047  | 0.031367 | 1.04%          | 1.02% | 0.83%    |
| Bacteria | Proteobacteria   | Alphaproteobacteria | Azospirillales     | Azospirillaceae            | Skermanella                | ASV8   | 3.454029  | 0.011951 | 1.01%          | 0.70% | 0.46%    |
| Bacteria | Bacteroidota     | Bacteroidia         | Chitinophagales    | Chitinophagaceae           | Chitinophagaceae_Unknown   | ASV100 | 3.540811  | 0.005089 | 0.98%          | 0.43% | 0.29%    |
| Bacteria | Acidobacteriota  | Vicinamibacteria    | Vicinamibacterales | Vicinamibacterales_Unknown | Vicinamibacterales_Unknown | ASV69  | 3.304356  | 0.022085 | 0.83%          | 0.54% | 0.42%    |
| Archaea  | Crenarchaeota    | Nitrososphaeria     | Nitrososphaerales  | Nitrososphaeraceae         | Candidatus_Nitrososphaera  | ASV81  | 3.138729  | 0.048921 | 0.62%          | 0.36% | 0.53%    |
| Bacteria | Proteobacteria   | Gammaproteobacteria | Xanthomonadales    | Xanthomonadaceae           | Arenimonas                 | ASV118 | 3.194191  | 0.013278 | 0.59%          | 0.46% | 0.28%    |
| Bacteria | Planctomycetota  | Planctomycetes      | Isosphaerales      | Isosphaeraceae             | Isosphaeraceae_Unknown     | ASV132 | 3.322537  | 0.010757 | 0.57%          | 0.27% | 0.17%    |
| Bacteria | Proteobacteria   | Gammaproteobacteria | Burkholderiales    | Comamonadaceae             | Methylibium                | ASV304 | 3.399283  | 0.047408 | 0.52%          | 0.23% | 0.00%    |
| Bacteria | Proteobacteria   | Gammaproteobacteria | Burkholderiales    | Comamonadaceae             | Ramlibacter                | ASV97  | 2.889544  | 0.02411  | 0.51%          | 0.46% | 0.38%    |
| Bacteria | Actinobacteriota | Acidimicrobiia      | Microtrichales     | Iamiaceae                  | Iamia                      | ASV137 | 3.170183  | 0.0035   | 0.49%          | 0.30% | 0.22%    |



|          |                  |                     |                        |                        |                           |         |          |          |                |          |       |
|----------|------------------|---------------------|------------------------|------------------------|---------------------------|---------|----------|----------|----------------|----------|-------|
| Bacteria | Bacteroidota     | Bacteroidia         | Chitinophagales        | Chitinophagaceae       | Parasegetibacter          | ASV152  | 2.829784 | 0.049787 | 0.37%          | 0.29%    | 0.25% |
| Bacteria | Verrucomicrobia  | Verrucomicrobiae    | Opitutales             | Opitutaceae            | Opitutus                  | ASV325  | 3.239043 | 0.042991 | 0.36%          | 0.22%    | 0.07% |
| Bacteria | Verrucomicrobia  | Verrucomicrobiae    | Pedosphaerales         | Pedosphaeraceae        | Pedosphaeraceae_Unknown   | ASV225  | 3.063478 | 0.023086 | 0.35%          | 0.27%    | 0.14% |
| Bacteria | Acidobacteriota  | Blastocatellia      | Pyrinomonadales        | Pyrinomonadaceae       | RB41                      | ASV221  | 3.066737 | 0.018859 | 0.35%          | 0.14%    | 0.14% |
| Bacteria | Verrucomicrobia  | Verrucomicrobiae    | Chthoniobacterales     | Chthoniobacteraceae    | Chthoniobacter            | ASV327  | 3.149858 | 0.004171 | 0.32%          | 0.16%    | 0.07% |
| Bacteria | Verrucomicrobia  | Verrucomicrobiae    | Verrucomicrobiales     | Rubritaleaceae         | Luteolibacter             | ASV269  | 3.134102 | 0.002436 | 0.31%          | 0.22%    | 0.06% |
| Bacteria | Proteobacteria   | Gammaproteobacteria | Burkholderiales        | TRA3_20                | TRA3_20_Unknown           | ASV513  | 3.114609 | 0.0287   | 0.27%          | 0.12%    | 0.02% |
| Bacteria | Gemmatimonadota  | Gemmatimonadetes    | Gemmatimonadales       | Gemmatimonadaceae      | Gemmatimonadaceae_Unknown | ASV399  | 3.012533 | 0.00542  | 0.26%          | 0.11%    | 0.08% |
| Bacteria | Proteobacteria   | Gammaproteobacteria | Diplorickettsiales     | Diplorickettsiaceae    | Aquicella                 | ASV501  | 3.070692 | 0.006462 | 0.25%          | 0.11%    | 0.04% |
| Bacteria | Planctomycetota  | Planctomycetes      | Pirellulales           | Pirellulaceae          | Pir4_lineage              | ASV512  | 3.142727 | 0.004106 | 0.25%          | 0.08%    | 0.01% |
| Bacteria | Planctomycetota  | Planctomycetes      | Gemmatales             | Gemmataceae            | Gemmata                   | ASV323  | 2.857857 | 0.017892 | 0.24%          | 0.14%    | 0.12% |
| Bacteria | Actinobacteriota | Actinobacteria      | Pseudonocardiales      | Pseudonocardaceae      | Pseudonocardia            | ASV126  | 3.026997 | 0.047408 | 0.20%          | 0.09%    | 0.00% |
| Bacteria | Actinobacteriota | Acidimicrobiia      | Microtrichales         | Ilumatobacteraceae     | Ilumatobacter             | ASV423  | 2.951536 | 0.009498 | 0.20%          | 0.13%    | 0.03% |
| Bacteria | Planctomycetota  | Planctomycetes      | Planctomycetes_Unknown | Planctomycetes_Unknown | Planctomycetes_Unknown    | ASV607  | 2.893751 | 0.015824 | 0.18%          | 0.09%    | 0.05% |
| Bacteria | Proteobacteria   | Gammaproteobacteria | Xanthomonadales        | Xanthomonadaceae       | Thermomonas               | ASV1050 | 2.927059 | 0.040323 | 0.16%          | 0.05%    | 0.00% |
| Bacteria | Firmicutes       | Bacilli             | Lactobacillales        | Lactobacillaceae       | Lactobacillus             | ASV187  | 2.90287  | 0.040323 | 0.14%          | 0.05%    | 0.00% |
| Bacteria | Proteobacteria   | Gammaproteobacteria | Oceanospirillales      | Pseudohongiellaceae    | BIyi10                    | ASV680  | 2.754287 | 0.036023 | 0.11%          | 0.10%    | 0.04% |
| Bacteria | Acidobacteriota  | Acidobacteriae      | Solibacterales         | Solibacteraceae        | Candidatus_Solibacter     | ASV613  | 2.757125 | 0.047408 | 0.11%          | 0.00%    | 0.10% |
| Bacteria | Planctomycetota  | Planctomycetes      | Gemmatales             | Gemmataceae            | Gemmata                   | ASV1575 | 2.781776 | 0.03277  | 0.10%          | 0.00%    | 0.01% |
| Bacteria | Bacteroidota     | Bacteroidia         | Chitinophagales        | Saprospiraceae         | Saprospiraceae_Unknown    | ASV1624 | 2.826352 | 0.040323 | 0.08%          | 0.02%    | 0.00% |
| Bacteria | Chloroflexi      | Chloroflexia        | Thermomicrobiales      | AKYG1722               | AKYG1722_Unknown          | ASV592  | 2.709215 | 0.044681 | 0.08%          | 0.05%    | 0.00% |
|          |                  |                     |                        |                        |                           |         |          |          | Mean abundance | Relative |       |

| CHT      |                       |                         |                     |                                |                                 |             | LDA score    | p value      | BT H      | CH T      | Contr ol |
|----------|-----------------------|-------------------------|---------------------|--------------------------------|---------------------------------|-------------|--------------|--------------|-----------|-----------|----------|
| Bacteria | Firmicutes            | Bacilli                 | Bacillales          | Bacillaceae                    | Bacillus                        | ASV7        | 3.6254<br>42 | 0.0246<br>8  | 0.31<br>% | 1.27<br>% | 0.93%    |
| Bacteria | Actinobacterio<br>ta  | Thermoleophilia         | Solirubrobacterales | Solirubrobacterales_Un<br>know | Solirubrobacterales_Unkn<br>onw | ASV14<br>0  | 3.2844<br>39 | 0.0260<br>04 | 0.05<br>% | 0.43<br>% | 0.32%    |
| Bacteria | Proteobacteria        | Gammaproteobac<br>teria | Burkholderiales     | Comamonadaceae                 | Ramlibacter                     | ASV12<br>3  | 3.1901<br>6  | 0.0020<br>41 | 0.00<br>% | 0.27<br>% | 0.23%    |
| Bacteria | Proteobacteria        | Alphaproteobacte<br>ria | Rhizobiales         | Beijerinckiaceae               | Microvirga                      | ASV53<br>26 | 3.1539<br>26 | 0.0142<br>4  | 0.00<br>% | 0.27<br>% | 0.16%    |
| Bacteria | Proteobacteria        | Alphaproteobacte<br>ria | Sphingomonadales    | Sphingomonadaceae              | Sphingomonas                    | ASV28<br>1  | 3.0426<br>14 | 0.0418<br>61 | 0.05<br>% | 0.26<br>% | 0.04%    |
| Bacteria | Actinobacterio<br>ta  | Actinobacteria          | Streptomycetales    | Streptomycetaceae              | Streptomyces                    | ASV36<br>9  | 3.0797<br>72 | 0.0139<br>14 | 0.06<br>% | 0.24<br>% | 0.00%    |
| Bacteria | Actinobacterio<br>ta  | Actinobacteria          | Pseudonocardiales   | Pseudonocardaceae              | Actinophytocola                 | ASV32<br>4  | 2.9080<br>12 | 0.0440<br>28 | 0.04<br>% | 0.19<br>% | 0.16%    |
| Bacteria | Actinobacterio<br>ta  | Thermoleophilia         | Solirubrobacterales | Solirubrobacterales_Un<br>know | Solirubrobacterales_Unkn<br>onw | ASV28<br>9  | 3.0584<br>86 | 0.0131<br>88 | 0.00<br>% | 0.19<br>% | 0.19%    |
| Bacteria | Proteobacteria        | Alphaproteobacte<br>ria | Reyranellales       | Reyranellaceae                 | Reyranella                      | ASV40<br>4  | 2.8058<br>2  | 0.0281<br>71 | 0.16<br>% | 0.17<br>% | 0.07%    |
| Bacteria | Entotheonellae<br>ota | Entotheonellia          | Entotheonellales    | Entotheonellaceae              | Entotheonellaceae_Unkno<br>wn   | ASV29<br>8  | 2.9691<br>72 | 0.0218<br>88 | 0.00<br>% | 0.16<br>% | 0.11%    |
| Bacteria | Proteobacteria        | Gammaproteobac<br>teria | Enterobacterales    | Enterobacteriaceae             | Klebsiella                      | ASV14<br>3  | 2.8956<br>07 | 0.0218<br>88 | 0.07<br>% | 0.14<br>% | 0.00%    |
| Bacteria | Bacteroidota          | Bacteroidia             | Chitinophagales     | Chitinophagaceae               | Chitinophagaceae_Unkno<br>wn    | ASV47<br>0  | 2.8624<br>04 | 0.0062       | 0.00<br>% | 0.12<br>% | 0.10%    |
| Bacteria | Proteobacteria        | Gammaproteobac<br>teria | Xanthomonadales     | Xanthomonadaceae               | Arenimonas                      | ASV71<br>0  | 2.8696<br>76 | 0.0291<br>28 | 0.01<br>% | 0.09<br>% | 0.05%    |
| Bacteria | Actinobacterio<br>ta  | Actinobacteria          | Micrococcales       | Microbacteriaceae              | Galbitalea                      | ASV71<br>4  | 2.7848<br>56 | 0.0369<br>38 | 0.00<br>% | 0.09<br>% | 0.05%    |
| Bacteria | Actinobacterio<br>ta  | Thermoleophilia         | Gaiellales          | Gaiellales_Unknown             | Gaiellales_Unknown              | ASV88<br>9  | 2.7721<br>11 | 0.0476<br>4  | 0.00<br>% | 0.08<br>% | 0.03%    |
| Bacteria | Proteobacteria        | Alphaproteobacte<br>ria | Caulobacterales     | Caulobacteraceae               | Brevundimonas                   | ASV88<br>7  | 2.6008<br>03 | 0.0413<br>73 | 0.04<br>% | 0.06<br>% | 0.00%    |

**Supplementary Table S4.** The fungal community members at the rhizosphere that emerged from LefSe analysis as discriminant for BTH and CHT treatments.

| Soil ITS       |                  |                                    |                               |                               |         |           |     | Mean abundance |           | Relative |        |          |
|----------------|------------------|------------------------------------|-------------------------------|-------------------------------|---------|-----------|-----|----------------|-----------|----------|--------|----------|
| BTH            |                  |                                    |                               |                               |         |           |     | LDA score      | p value   | BTH      | CH T   | Contr ol |
| Ascomy cota    | Sordariom ycetes | Hypocreales                        | Nectriaceae                   | Gibberella intricans          | ASV 6   | 5.126 251 | BTH | 4.445 159      | 0.045 34  | 13.37 %  | 9.75 % | 7.42%    |
| Ascomy cota    | Pezizomycetes    | Pezizales                          | Ascobolaceae                  | Ascobolus_Unknown             | ASV 137 | 3.701 854 | BTH | 3.542 22       | 0.021 691 | 0.50 %   | 0.02 % | 0.00%    |
| Ascomy cota    | Sordariom ycetes | Sordariales                        | Chaetomiaceae                 | Amesia atrobrunnea            | ASV 121 | 3.593 128 | BTH | 3.315 422      | 0.003 143 | 0.39 %   | 0.00 % | 0.14%    |
| Basidio mycota | Agaricom ycetes  | Agaricales                         | Psathyrellaceae               | Coprinellus verrucispermus    | ASV 183 | 3.535 954 | BTH | 3.315 109      | 0.019 618 | 0.34 %   | 0.00 % | 0.15%    |
| Ascomy cota    | Eurotiomycetes   | Eurotiales                         | Aspergillaceae                | Penicillium_Unknown           | ASV 182 | 3.382 32  | BTH | 3.296 914      | 0.033 912 | 0.24 %   | 0.14 % | 0.01%    |
| Ascomy cota    | Sordariom ycetes | Hypocreales                        | Nectriaceae                   | Dactylonectria macrodidyma    | ASV 134 | 3.294 956 | BTH | 3.119 48       | 0.041 23  | 0.20 %   | 0.05 % | 0.15%    |
| Ascomy cota    | Dothideo mycetes | Pleosporales                       | Sporormiaceae                 | Preussia terricola            | ASV 226 | 2.926 681 | BTH | 3.305 502      | 0.032 77  | 0.08 %   | 0.00 % | 0.01%    |
| CHT            |                  |                                    |                               |                               |         |           |     | Mean abundance |           | Relative |        |          |
|                |                  |                                    |                               |                               |         |           |     | LDA score      | p value   | BTH      | CH T   | Contr ol |
| Ascomy cota    | Sordariom ycetes | Sordariales                        | Chaetomiaceae                 | Botryotrichum spirotrichum    | ASV 35  | 4.144 331 | CHT | 3.668 629      | 0.010 948 | 1.27 %   | 1.39 % | 0.49%    |
| Ascomy cota    | Dothideo mycetes | Pleosporales                       | Pleosporaceae                 | Alternaria alternata          | ASV 1   | 4.036 844 | CHT | 3.698 623      | 0.009 226 | 0.25 %   | 1.09 % | 0.13%    |
| Ascomy cota    | Eurotiomycetes   | Eurotiales                         | Aspergillaceae                | Aspergillus_Unknown           | ASV 46  | 3.974 609 | CHT | 3.676 987      | 0.037 916 | 0.94 %   | 0.94 % | 0.14%    |
| Ascomy cota    | Sordariom ycetes | Glomerellales                      | Plectosphaerellaceae          | Plectosphaerella_Unknown      | ASV 69  | 3.951 072 | CHT | 3.581 059      | 0.018 175 | 0.35 %   | 0.89 % | 0.11%    |
| Ascomy cota    | Sordariom ycetes | Sordariales                        | Chaetomiaceae                 | Chaetomiaceae_Unknown         | ASV 96  | 3.569 568 | CHT | 3.369 105      | 0.025 622 | 0.00 %   | 0.37 % | 0.32%    |
| Ascomy cota    | Dothideo mycetes | Capnodiales                        | Cladosporiaceae               | Cladosporium_Unknown          | ASV 3   | 3.525 124 | CHT | 3.256 162      | 0.027 144 | 0.04 %   | 0.34 % | 0.20%    |
| Ascomy cota    | Dothideo mycetes | Dothideomycetes_ord_Incertae_sedis | Eremomycetaceae               | Arthrographis chlamydospora   | ASV 141 | 3.491 241 | CHT | 3.241 251      | 0.010 54  | 0.00 %   | 0.31 % | 0.27%    |
| Ascomy cota    | Eurotiomycetes   | Onygenales                         | Onygenales_fam_Incertae_sedis | Chrysosporium pseudomerdarium | ASV 175 | 3.359 948 | CHT | 3.165 351      | 0.020 287 | 0.06 %   | 0.23 % | 0.02%    |

|                   |                    |            |                  |                                   |            |              |     |              |              |           |           |       |
|-------------------|--------------------|------------|------------------|-----------------------------------|------------|--------------|-----|--------------|--------------|-----------|-----------|-------|
| Basidio<br>mycota | Agaricom<br>ycetes | Agaricales | Agaricaceae      | Leucocoprinuss<br>traminellus     | ASV<br>197 | 3.357<br>015 | CHT | 3.232<br>349 | 0.036<br>938 | 0.00<br>% | 0.23<br>% | 0.08% |
| Ascomy<br>cota    | Eurotiomy<br>cetes | Onygenales | Ajellomycetaceae | Emmonsiiellopsis<br>coralliformis | ASV<br>506 | 2.494<br>663 | CHT | 3.157<br>444 | 0.047<br>408 | 0.00<br>% | 0.03<br>% | 0.02% |

**Supplementary Table S5** The prokaryotic community members at the phyllosphere that emerged from LefSe analysis as discriminant for BTH and CHT treatments.

| Leaf_1<br>6S<br>BTH |                      |                         |                      |                         |                                                |             |              |     | LDA<br>score | p<br>value   | Mean<br>abundance |           | Relative    |
|---------------------|----------------------|-------------------------|----------------------|-------------------------|------------------------------------------------|-------------|--------------|-----|--------------|--------------|-------------------|-----------|-------------|
|                     |                      |                         |                      |                         |                                                |             |              |     |              |              | BTH               | CHT       | Contr<br>ol |
| Bacteri<br>a        | Proteobac<br>teria   | Gammaproteo<br>bacteria | Burkholderi<br>ales  | Oxalobactera<br>ceae    | Massilia                                       | ASV<br>1    | 4.787<br>605 | BTH | 3.970<br>77  | 0.024<br>971 | 6.13<br>%         | 4.42<br>% | 4.44%       |
| Bacteri<br>a        | Actinoba<br>cteriota | Actinobacteri<br>a      | Micrococca<br>les    | Micrococcace<br>ae      | Pseudarthrobacter                              | ASV<br>2    | 4.655<br>994 | BTH | 3.855<br>903 | 0.024<br>11  | 4.53<br>%         | 3.13<br>% | 3.49%       |
| Bacteri<br>a        | Actinoba<br>cteriota | Actinobacteri<br>a      | Micrococca<br>les    | Intrasporangi<br>aceae  | Intrasporangiaceae_Unknown                     | ASV<br>176  | 3.757<br>611 | BTH | 3.157<br>748 | 0.046<br>367 | 0.57<br>%         | 0.27<br>% | 0.33%       |
| Bacteri<br>a        | Actinoba<br>cteriota | Actinobacteri<br>a      | Micrococca<br>les    | Micrococcace<br>ae      | Kocuria                                        | ASV<br>133  | 3.755<br>498 | BTH | 3.306<br>226 | 0.025<br>765 | 0.57<br>%         | 0.48<br>% | 0.26%       |
| Bacteri<br>a        | Bacteroid<br>ota     | Bacteroidia             | Cytophagal<br>es     | Hymenobacte<br>raceae   | Rufibacter                                     | ASV<br>138  | 3.754<br>207 | BTH | 3.386<br>81  | 0.019<br>453 | 0.57<br>%         | 0.44<br>% | 0.17%       |
| Bacteri<br>a        | Chlorofle<br>xi      | KD4_96                  | KD4_96_U<br>nknown   | KD4_97_Unk<br>nown      | KD4_98_Unknown                                 | ASV<br>20   | 3.734<br>18  | BTH | 3.287<br>302 | 0.011<br>897 | 0.54<br>%         | 0.19<br>% | 0.39%       |
| Bacteri<br>a        | Proteobac<br>teria   | Gammaproteo<br>bacteria | Burkholderi<br>ales  | Oxalobactera<br>ceae    | Massilia                                       | ASV<br>455  | 3.382<br>371 | BTH | 3.193<br>658 | 0.047<br>64  | 0.24<br>%         | 0.08<br>% | 0.00%       |
| Bacteri<br>a        | Actinoba<br>cteriota | Actinobacteri<br>a      | Frankiales           | Geodermatop<br>hilaceae | Modestobacter                                  | ASV<br>722  | 3.314<br>889 | BTH | 3.254<br>846 | 0.013<br>3   | 0.21<br>%         | 0.06<br>% | 0.00%       |
| Bacteri<br>a        | Actinoba<br>cteriota | Actinobacteri<br>a      | Frankiales           | Geodermatop<br>hilaceae | Blastococcus                                   | ASV<br>820  | 3.226<br>052 | BTH | 3.216<br>145 | 0.021<br>691 | 0.17<br>%         | 0.00<br>% | 0.02%       |
| Bacteri<br>a        | Firmicute<br>s       | Bacilli                 | Paenibacill<br>ales  | Paenibacillac<br>eae    | Paenibacillaceae_Unknown                       | ASV<br>256  | 3.045<br>303 | BTH | 3.183<br>165 | 0.041<br>373 | 0.11<br>%         | 0.06<br>% | 0.00%       |
| Bacteri<br>a        | Bacteroid<br>ota     | Bacteroidia             | Cytophagal<br>es     | Hymenobacte<br>raceae   | Adhaeribacter                                  | ASV<br>1309 | 3.006<br>18  | BTH | 3.413<br>66  | 0.002<br>48  | 0.10<br>%         | 0.00<br>% | 0.02%       |
| Bacteri<br>a        | Proteobac<br>teria   | Alphaproteob<br>acteria | Sphingomo<br>nadales | Sphingomona<br>daceae   | Altererythrobacter                             | ASV<br>1056 | 2.966<br>398 | BTH | 3.358<br>309 | 0.046<br>284 | 0.09<br>%         | 0.06<br>% | 0.00%       |
| Bacteri<br>a        | Firmicute<br>s       | Bacilli                 | Paenibacill<br>ales  | Paenibacillac<br>eae    | Paenibacillaceae_Unknown                       | ASV<br>651  | 2.789<br>865 | BTH | 3.326<br>376 | 0.028<br>729 | 0.06<br>%         | 0.00<br>% | 0.01%       |
| CHT                 |                      |                         |                      |                         |                                                |             |              |     | LDA<br>score | p<br>value   | Mean<br>abundance |           | Relative    |
|                     |                      |                         |                      |                         |                                                |             |              |     |              |              | BTH               | CHT       | Contr<br>ol |
| Bacteri<br>a        | Proteobac<br>teria   | Alphaproteob<br>acteria | Azospirillal<br>es   | Azospirillace<br>ae     | Skermanella                                    | ASV<br>8    | 4.393<br>678 | CHT | 3.709<br>064 | 0.046<br>413 | 1.46<br>%         | 2.48<br>% | 1.96%       |
| Bacteri<br>a        | Proteobac<br>teria   | Gammaproteo<br>bacteria | Pseudomon<br>adales  | Moraxellacea<br>e       | Enhydrobacter                                  | ASV<br>94   | 3.851<br>484 | CHT | 3.481<br>227 | 0.021<br>893 | 0.10<br>%         | 0.71<br>% | 0.04%       |
| Bacteri<br>a        | Proteobac<br>teria   | Gammaproteo<br>bacteria | Burkholderi<br>ales  | Burkholderia<br>ceae    | Burkholderia_Caballeronia_P<br>araburkholderia | ASV<br>3    | 3.846<br>222 | CHT | 3.572<br>232 | 0.015<br>709 | 0.02<br>%         | 0.70<br>% | 0.01%       |

|          |                |                     |                     |                      |                           |            |              |     |              |              |           |           |       |
|----------|----------------|---------------------|---------------------|----------------------|---------------------------|------------|--------------|-----|--------------|--------------|-----------|-----------|-------|
| Bacteria | Actinobacteria | Rubrobacteria       | Rubrobacterales     | Rubrobacteriaceae    | Rubrobacter               | ASV<br>36  | 3.649<br>164 | CHT | 3.151<br>043 | 0.023<br>74  | 0.15<br>% | 0.45<br>% | 0.37% |
| Bacteria | Proteobacteria | Alphaproteobacteria | Rhizobiales         | Beijerinckiaeae      | Microvirga                | ASV<br>187 | 3.644<br>12  | CHT | 3.144<br>445 | 0.021<br>867 | 0.16<br>% | 0.44<br>% | 0.38% |
| Bacteria | Proteobacteria | Alphaproteobacteria | Rhizobiales         | Rhizobiaceae         | Rhizobiaceae_Unknown      | ASV<br>415 | 3.407<br>648 | CHT | 3.206<br>678 | 0.021<br>691 | 0.00<br>% | 0.26<br>% | 0.03% |
| Bacteria | Proteobacteria | Alphaproteobacteria | Rhizobiales         | Beijerinckiaeae      | Beijerinckiaeae_Unknown   | ASV<br>348 | 3.331<br>4   | CHT | 3.132<br>502 | 0.022<br>689 | 0.03<br>% | 0.21<br>% | 0.16% |
| Bacteria | Proteobacteria | Gammaproteobacteria | Burkholderiales     | Comamonadaceae       | Paucibacter               | ASV<br>87  | 3.317<br>841 | CHT | 3.267<br>621 | 0.021<br>691 | 0.00<br>% | 0.21<br>% | 0.03% |
| Bacteria | Actinobacteria | Actinobacteriia     | Propionibacteriales | Propionibacteriaceae | Microlunatus              | ASV<br>467 | 3.147<br>277 | CHT | 3.083<br>994 | 0.018<br>144 | 0.00<br>% | 0.14<br>% | 0.04% |
| Bacteria | Proteobacteria | Alphaproteobacteria | Sphingomonadales    | Sphingomonadaceae    | Sphingomonadaceae_Unknown | ASV<br>658 | 3.139<br>237 | CHT | 3.078<br>166 | 0.046<br>284 | 0.12<br>% | 0.14<br>% | 0.00% |
| Bacteria | Proteobacteria | Alphaproteobacteria | Acetobacteriales    | Acetobacteraceae     | Craurococcus_Caldovatus   | ASV<br>691 | 3.091<br>531 | CHT | 2.994<br>357 | 0.017<br>868 | 0.00<br>% | 0.12<br>% | 0.10% |

**Supplementary Table S6.** The fungal community members at the phyllosphere that emerged from LefSe analysis as discriminant for BTH and CHT treatments.

| Leaf ITS      |                 |                   |                    |                         |        |          |     |           |          | Mean abundance |       | Relative |
|---------------|-----------------|-------------------|--------------------|-------------------------|--------|----------|-----|-----------|----------|----------------|-------|----------|
| BTH           |                 |                   |                    |                         |        |          |     | LDA score | p value  | BTH            | CH T  | Contr ol |
| Ascomycota    | Dothideomycetes | Pleosporales      | Didymosphaeriaceae | Pseudopithomyces rosae  | ASV22  | 4.60211  | BTH | 3.975854  | 0.003006 | 4.00%          | 2.95% | 2.18%    |
| Ascomycota    | Dothideomycetes | Dothideales       | Dothioraceae       | Dothiora_Unknown        | ASV171 | 3.71065  | BTH | 3.506373  | 0.011607 | 0.51%          | 0.08% | 0.04%    |
| Basidiomycota | Agaricomycetes  | Polyporales       | Ganodermataceae    | Ganoderma_Unknown       | ASV294 | 3.423727 | BTH | 3.453198  | 0.004093 | 0.27%          | 0.08% | 0.12%    |
| Ascomycota    | Saccharomyces   | Saccharomycetales | Debaryomycetaceae  | Debaryomyces hansenii   | ASV33  | 3.415451 | BTH | 3.345142  | 0.03836  | 0.26%          | 0.19% | 0.02%    |
| Ascomycota    | Eurotiomycetes  | Eurotiales        | Trichocomaceae     | Thermomyces lanuginosus | ASV192 | 3.221209 | BTH | 3.445059  | 0.015458 | 0.17%          | 0.06% | 0.04%    |
| CHT           |                 |                   |                    |                         |        |          |     |           |          | Mean abundance |       | Relative |
|               |                 |                   |                    |                         |        |          |     | LDA score | p value  | BTH            | CH T  | Contr ol |
| Ascomycota    | Dothideomycetes | Pleosporales      | Didymellaceae      | Epicoccum_Unknown       | ASV32  | 4.257883 | CHT | 3.732387  | 0.038044 | 1.74%          | 1.81% | 0.88%    |
| Ascomycota    | Sordariomycetes | Xylariales        | Amphisphaeriaceae  | Seimatosporium vitis    | ASV31  | 3.571163 | CHT | 3.267057  | 0.034906 | 0.05%          | 0.37% | 0.36%    |



**Supplementary Table S7** The prokaryotic community members at the carposphere that emerged from LefSe analysis as discriminant for ABA, BTH and CHT treatments.

| Fruit_16S |                  |                     |                                     |                                        |                                            |         |           |     |           |           | Mean abundance |        | Relative |         |
|-----------|------------------|---------------------|-------------------------------------|----------------------------------------|--------------------------------------------|---------|-----------|-----|-----------|-----------|----------------|--------|----------|---------|
| ABA       |                  |                     |                                     |                                        |                                            |         |           |     | LDA score | p value   | CT H           | BT H   | AB A     | Control |
| Bacteria  | Actinobacteriota | Actinobacteria      | Micrococcales                       | Brevibacteriaceae                      | Brevibacterium                             | ASV 155 | 4.499 43  | AB  | 4.173 66  | 0.000 49  | 0.0 9%         | 0.0 8% | 3.1 6%   | 0.00 %  |
| Bacteria  | Proteobacteria   | Gammaproteobacteria | Burkholderiales                     | Oxalobacteraceae                       | Massilia                                   | ASV 35  | 4.412 976 | AB  | 4.141 981 | 0.000 656 | 0.2 3%         | 0.1 7% | 2.5 9%   | 0.00 %  |
| Bacteria  | Firmicutes       | Bacilli             | Bacillales                          | Planococcaceae                         | Planococcaceae_Unknown                     | ASV 17  | 4.394 677 | AB  | 3.943 188 | 0.037 253 | 1.5 1%         | 0.7 8% | 2.4 8%   | 0.77 %  |
| Bacteria  | Firmicutes       | Bacilli             | Bacillales                          | Planococcaceae                         | Domibacillus                               | ASV 76  | 4.129 545 | AB  | 3.751 479 | 0.043 157 | 0.4 7%         | 0.2 9% | 1.3 5%   | 0.20 %  |
| Bacteria  | Actinobacteriota | Actinobacteria      | Micrococcales                       | Microbacteriaceae                      | Curtobacterium                             | ASV 200 | 3.965 899 | AB  | 3.762 708 | 0.046 103 | 0.1 5%         | 0.1 3% | 0.9 2%   | 0.00 %  |
| Bacteria  | Firmicutes       | Bacilli             | Thermoactinomycetales               | Thermoactinomycetaceae                 | Thermoactinomyces                          | ASV 60  | 3.918 923 | AB  | 3.807 628 | 0.001 495 | 0.1 1%         | 0.3 6% | 0.8 3%   | 0.04 %  |
| Bacteria  | Proteobacteria   | Alphaproteobacteria | Caulobacterales                     | Caulobacteraceae                       | Brevundimonas                              | ASV 335 | 3.895 873 | AB  | 3.800 176 | 0.001 459 | 0.0 0%         | 0.1 0% | 0.7 9%   | 0.09 %  |
| Bacteria  | Firmicutes       | Clostridia          | Peptostreptococcales_Tissierellales | Peptostreptococcales_Tissierellales_fa | Anaerococcus                               | ASV 742 | 3.134 625 | AB  | 3.810 795 | 0.027 693 | 0.0 0%         | 0.0 7% | 0.1 4%   | 0.04 %  |
|           |                  |                     |                                     |                                        |                                            |         |           |     |           |           | Mean abundance |        | Relative |         |
| BTH       |                  |                     |                                     |                                        |                                            |         |           |     | LDA score | p value   | CT H           | BT H   | AB A     | Control |
| Bacteria  | Proteobacteria   | Gammaproteobacteria | Burkholderiales                     | Burkholderiaceae                       | Burkholderia_Caballeronia_Paraburkholderia | ASV 9   | 4.761 234 | BTH | 4.483 75  | 0.046 045 | 0.5 5%         | 5.7 7% | 1.6 2%   | 5.52 %  |
| Bacteria  | Proteobacteria   | Gammaproteobacteria | Burkholderiales                     | Comamonadaceae                         | Curvibacter                                | ASV 46  | 4.507 572 | BTH | 4.192 75  | 0.035 449 | 0.0 0%         | 3.2 2% | 1.0 3%   | 1.28 %  |

|          |                  |                     |                     |                      |                             |          |           |     |           |           |                |        |          |         |
|----------|------------------|---------------------|---------------------|----------------------|-----------------------------|----------|-----------|-----|-----------|-----------|----------------|--------|----------|---------|
| Bacteria | Proteobacteria   | Alphaproteobacteria | Rhodospirillales    | Magnetospirillaceae  | Magnetospirillaceae_Unknown | ASV 54   | 4.342 525 | BTH | 4.034 23  | 0.036 239 | 0.0 0%         | 2.2 0% | 1.1 9%   | 1.24 %  |
| Bacteria | Proteobacteria   | Alphaproteobacteria | Sphingomonadales    | Sphingomonadaceae    | Novosphingobium             | ASV 43   | 4.338 039 | BTH | 4.027 18  | 0.042 406 | 0.0 0%         | 2.1 8% | 0.6 9%   | 1.58 %  |
| Bacteria | Proteobacteria   | Gammaproteobacteria | Burkholderiales     | Comamonadaceae       | Paucibacter                 | ASV 67   | 4.142 174 | BTH | 3.842 425 | 0.019 769 | 0.0 0%         | 1.3 9% | 0.3 5%   | 0.62 %  |
| Bacteria | Proteobacteria   | Gammaproteobacteria | Burkholderiales     | Comamonadaceae       | Paucibacter                 | ASV 87   | 4.126 812 | BTH | 3.834 999 | 0.038 926 | 0.0 0%         | 1.3 4% | 0.7 6%   | 0.69 %  |
| Bacteria | Proteobacteria   | Alphaproteobacteria | Sphingomonadales    | Sphingomonadaceae    | Novosphingobium             | ASV 195  | 4.103 683 | BTH | 3.797 368 | 0.037 856 | 0.0 0%         | 1.2 7% | 0.2 9%   | 0.20 %  |
| Bacteria | Proteobacteria   | Alphaproteobacteria | Azospirillales      | Azospirillaceae      | Skermanella                 | ASV 16   | 3.890 153 | BTH | 3.600 567 | 0.044 656 | 0.4 6%         | 0.7 8% | 0.3 2%   | 0.00 %  |
| Bacteria | Proteobacteria   | Alphaproteobacteria | Rhizobiales         | Xanthobacteraceae    | Bradyrhizobium              | ASV 23   | 3.764 835 | BTH | 3.528 894 | 0.029 117 | 0.0 0%         | 0.5 8% | 0.4 1%   | 0.26 %  |
| Bacteria | Proteobacteria   | Alphaproteobacteria | Sphingomonadales    | Sphingomonadaceae    | Novosphingobium             | ASV 394  | 3.757 652 | BTH | 3.544 203 | 0.029 681 | 0.0 0%         | 0.5 7% | 0.0 9%   | 0.30 %  |
| Bacteria | Proteobacteria   | Gammaproteobacteria | Salinisphaerales    | Solimonadaceae       | Nevskia                     | ASV 497  | 3.646 011 | BTH | 3.496 415 | 0.014 912 | 0.0 0%         | 0.4 4% | 0.0 2%   | 0.22 %  |
| Bacteria | Proteobacteria   | Gammaproteobacteria | Burkholderiales     | Burkholderiaceae     | Ralstonia                   | ASV 478  | 3.478 468 | BTH | 3.250 139 | 0.026 962 | 0.1 3%         | 0.3 0% | 0.1 3%   | 0.00 %  |
| Bacteria | Actinobacteriota | Actinobacteria      | Micrococcales       | Microbacteriaceae    | Microbacterium              | ASV 1013 | 3.286 839 | BTH | 3.573 928 | 0.047 385 | 0.0 0%         | 0.1 9% | 0.0 4%   | 0.02 %  |
| CHT      |                  |                     |                     |                      |                             |          |           |     | LDA score | p value   | Mean abundance |        | Relative |         |
|          |                  |                     |                     |                      |                             |          |           |     |           |           | CT H           | BT H   | AB A     | Control |
| Bacteria | Actinobacteriota | Actinobacteria      | Propionibacteriales | Propionibacteriaceae | Cutibacterium               | ASV 19   | 4.738 796 | CTH | 4.379 759 | 0.007 225 | 5.4 8%         | 2.3 9% | 0.7 8%   | 4.68 %  |
| Bacteria | Proteobacteria   | Gammaproteobacteria | Burkholderiales     | Oxalobacteraceae     | Massilia                    | ASV 1    | 4.627 941 | CTH | 4.176 592 | 0.031 56  | 4.2 5%         | 1.5 4% | 4.2 4%   | 1.11 %  |

|          |                  |                |                   |                    |                          |            |              |             |              |              |           |           |           |           |
|----------|------------------|----------------|-------------------|--------------------|--------------------------|------------|--------------|-------------|--------------|--------------|-----------|-----------|-----------|-----------|
| Bacteria | Firmicutes       | Bacilli        | Lactobacillales   | Streptococcaceae   | Lactococcus              | ASV<br>4   | 4.486<br>086 | C<br>T<br>H | 4.193<br>571 | 0.018<br>078 | 3.0<br>6% | 0.5<br>2% | 0.0<br>4% | 1.85<br>% |
| Bacteria | Actinobacteriota | Actinobacteria | Corynebacteriales | Corynebacteriaceae | Lawsonella               | ASV<br>164 | 4.222<br>079 | C<br>T<br>H | 3.937<br>821 | 0.012<br>792 | 1.6<br>7% | 0.3<br>0% | 0.0<br>5% | 0.62<br>% |
| Bacteria | Firmicutes       | Bacilli        | Staphylococcales  | Staphylococcaceae  | Staphylococcus           | ASV<br>61  | 4.188<br>454 | C<br>T<br>H | 3.744<br>597 | 0.019<br>401 | 1.5<br>4% | 0.5<br>2% | 0.4<br>1% | 1.47<br>% |
| Bacteria | Firmicutes       | Bacilli        | Lactobacillales   | Lactobacillaceae   | Lactobacillus            | ASV<br>18  | 4.146<br>885 | C<br>T<br>H | 3.847<br>389 | 0.022<br>689 | 1.4<br>0% | 0.6<br>4% | 0.0<br>0% | 0.96<br>% |
| Bacteria | Firmicutes       | Bacilli        | Paenibacillales   | Paenibacillaceae   | Paenibacillaceae_Unknown | ASV<br>256 | 4.062<br>384 | C<br>T<br>H | 3.777<br>604 | 0.026<br>292 | 1.1<br>5% | 0.2<br>9% | 0.3<br>4% | 0.00<br>% |

**Supplementary Table S8.** The fungal community members at the carposphere that emerged from LefSe analysis as discriminant for BTH, CHT and ABA treatments.

| ABA           |                 |                   |                                 |                          |         |                                  |           |       | LDA score | p value   | CT H                    | BT H    | AB A    | Control |
|---------------|-----------------|-------------------|---------------------------------|--------------------------|---------|----------------------------------|-----------|-------|-----------|-----------|-------------------------|---------|---------|---------|
| Ascomycota    | Dothideomycetes | Dothideales       | Aureobasidiaceae                | Aureobasidium pullulans  | ASV 4   | Aureobasidium pullulans(ASV4)    | 5.369 023 | A B A | 4.963 875 | 0.010 116 | 5.15 %                  | 7.88 %  | 23.3 9% | 5.17 %  |
| Ascomycota    | Saccharomycetes | Saccharomycetales | Debaryomycetaceae               | Debaryomyces hansenii    | ASV 33  | Debaryomyces hansenii(ASV33)     | 4.870 322 | A B A | 4.523 488 | 0.008 942 | 0.94 %                  | 0.62 %  | 7.42 %  | 0.66 %  |
| Ascomycota    | Saccharomycetes | Saccharomycetales | Saccharomycetaceae              | Saccharomyces _Unknown   | ASV 199 | Saccharomyces _Unknown(ASV199)   | 4.144 138 | A B A | 3.848 425 | 0.032 555 | 0.00 %                  | 0.01 %  | 1.39 %  | 0.03 %  |
| Basidiomycota | Tremellomycetes | Tremellales       | Bulleribasidiaceae              | Vishniacozyma foliicola  | ASV 208 | Vishniacozyma foliicola(ASV208)  | 4.142 343 | A B A | 3.837 641 | 0.000 436 | 0.06 %                  | 0.02 %  | 1.39 %  | 0.00 %  |
| Ascomycota    | Dothideomycetes | Pleosporales      | Pleosporales_fam_Incertae_sedis | Foliophoma fallens       | ASV 327 | Foliophoma fallens(ASV327)       | 3.833 675 | A B A | 3.633 916 | 0.024 276 | 0.02 %                  | 0.01 %  | 0.68 %  | 0.02 %  |
| Basidiomycota | Tremellomycetes | Tremellales       | Bulleribasidiaceae              | Vishniacozyma carnescens | ASV 205 | Vishniacozyma carnescens(ASV205) | 3.361 968 | A B A | 3.550 39  | 0.038 303 | 0.00 %                  | 0.04 %  | 0.23 %  | 0.07 %  |
| BTH           |                 |                   |                                 |                          |         |                                  |           |       |           |           | Mean Relative abundance |         |         |         |
|               |                 |                   |                                 |                          |         |                                  |           |       | LDA score | p value   | CT H                    | BT H    | AB A    | Control |
| Ascomycota    | Leotiomyces     | Helotiales        | Sclerotiniaceae                 | Sclerotiniaceae _Unknown | ASV 51  | Sclerotiniaceae _Unknown(ASV51)  | 4.516 295 | BT H  | 4.258 39  | 0.042 158 | 0.13 %                  | 3.28 %  | 0.38 %  | 0.01 %  |
| Ascomycota    | Eurotiomycetes  | Eurotiales        | Aspergillaceae                  | Aspergillus carbonarius  | ASV 92  | Aspergillus carbonarius(ASV92)   | 3.458 271 | BT H  | 3.315 684 | 0.011 816 | 0.01 %                  | 0.29 %  | 0.00 %  | 0.04 %  |
| CHT           |                 |                   |                                 |                          |         |                                  |           |       |           |           | Mean Relative abundance |         |         |         |
|               |                 |                   |                                 |                          |         |                                  |           |       | LDA score | p value   | CT H                    | BT H    | AB A    | Control |
| Ascomycota    | Dothideomycetes | Pleosporales      | Pleosporaceae                   | Alternaria alternata     | ASV 1   | Alternaria alternata(ASV1)       | 5.378 932 | CT H  | 4.593 128 | 0.018 566 | 23.9 3%                 | 17.3 7% | 16.1 5% | 20.0 9% |
| Ascomycota    | Dothideomycetes | Pleosporales      | Pleosporaceae                   | Stemphylium _Unknown     | ASV 9   | Stemphylium _Unknown(ASV9)       | 4.641 127 | CT H  | 4.113 807 | 0.016 531 | 4.38 %                  | 3.67 %  | 1.84 %  | 4.01 %  |
| Ascomycota    | Dothideomycetes | Pleosporales      | Didymellaceae                   | Didymellaceae _Unknown   | ASV 40  | Didymellaceae _Unknown(ASV40)    | 4.028 552 | CT H  | 3.776 784 | 0.001 621 | 1.07 %                  | 0.47 %  | 0.00 %  | 0.54 %  |

|               |                 |                   |                     |                       |        |                              |          |     |          |          |       |       |       |       |
|---------------|-----------------|-------------------|---------------------|-----------------------|--------|------------------------------|----------|-----|----------|----------|-------|-------|-------|-------|
| Ascomycota    | Sordariomycetes | Trichosphaeriales | Trichosphaeriaceae  | Nigrospora oryzae     | ASV87  | Nigrospora oryzae(ASV87)     | 3.564512 | CTH | 3.620798 | 0.0168   | 0.37% | 0.11% | 0.13% | 0.10% |
| Ascomycota    | Dothideomycetes | Pleosporales      | Pleosporaceae       | Alternaria_Unknown    | ASV115 | Alternaria_Unknown(ASV115)   | 3.549621 | CTH | 3.658485 | 0.000726 | 0.35% | 0.06% | 0.00% | 0.24% |
| Basidiomycota | Tremellomycetes | Filobasidiales    | Piskurozymaceae     | Solicoccozyma_Unknown | ASV13  | Solicoccozyma_Unknown(ASV13) | 3.343636 | CTH | 3.490115 | 0.026962 | 0.22% | 0.03% | 0.01% | 0.03% |
| Basidiomycota | Pucciniales     | Pucciniales       | Pucciniales_Unknown | Pucciniales_Unknown   | ASV256 | Pucciniales_Unknown(ASV256)  | 3.231668 | CTH | 3.654385 | 0.039884 | 0.17% | 0.01% | 0.00% | 0.04% |
